# Supplementary material for: Cathepsin B plays a role in spermatogenesis and sperm maturation through regulating autophagy and apoptosis in mice
Source: PeerJ. 2022 Dec 2;10:e14472. doi: 10.7717/peerj.14472 (PMC9744162; doi:10.7717/peerj.14472)
Supplement: Supplemental Information 1 [file peerj-10-14472-s001.xlsx]

## Sheet: Sheet1
			Caput epididymidis	Cauda epididymidis	Heart	Testis	Liver	Spleen	Lung	Kidney	Brain
			1	0.554785	0.325335	0.190782	1.12506	1.27456	0.702222	1.06437	0.521233
			1	0.562529	0.408951	0.246558	1.26576	1.69349	0.876606	0.594604	0.550953
			1	0.550953	0.248273	0.208772	1.09429	1.08673	0.692555	0.598739	0.528509
			Heart	Liver	Spleen	Lung	Kidney	Caput epididymidis	Cauda epididymidis	Testis	Brain
			0.0214928	0.0743254	0.0842021	0.0463914	0.0703162	0.0660636	0.0366511	0.0126038	0.0344345
			0.0253829	0.0785633	0.105112	0.0544094	0.036906	0.0620683	0.0349152	0.0153034	0.0341967
			0.0185814	0.0818996	0.0813339	0.0518325	0.0448111	0.0748424	0.03125	0.015625	0.0395549
	Caput epididymidis	21.5	17.58	3.92		1			Heart	23.34	17.8	5.54	0.0214928
	Cauda epididymidis	22.25	17.48	4.77	0.85	0.554785			Liver	20.48	16.73	3.75	0.0743254
	Heart	23.34	17.8	5.54	1.62	0.325335			Spleen	23.51	19.94	3.57	0.0842021
	Testis	21.54	15.23	6.31	2.39	0.190782			Lung	23.45	19.02	4.43	0.0463914
	Liver	20.48	16.73	3.75	-0.17	1.12506			Kidney	20.53	16.7	3.83	0.0703162
	Spleen	23.51	19.94	3.57	-0.35	1.27456			Caput epididymidis	21.5	17.58	3.92	0.0660636
	Lung	23.45	19.02	4.43	0.51	0.702222			Cauda epididymidis	22.25	17.48	4.77	0.0366511
	Kidney	20.53	16.7	3.83	-0.09	1.06437			Testis	21.54	15.23	6.31	0.0126038
	Brain	20.65	15.79	4.86	0.94	0.521233			Brain	20.65	15.79	4.86	0.0344345
	Caput epididymidis	21.6	17.59	4.01		1
	Cauda epididymidis	22.1	17.26	4.84	0.83	0.562529			Heart	23.41	18.11	5.3	0.0253829
	Heart	23.41	18.11	5.3	1.29	0.408951			Liver	20.51	16.84	3.67	0.0785633
	Testis	21.13	15.1	6.03	2.02	0.246558			Spleen	23.2	19.95	3.25	0.105112
	Liver	20.51	16.84	3.67	-0.34	1.26576			Lung	23.19	18.99	4.2	0.0544094
	Spleen	23.2	19.95	3.25	-0.76	1.69349			Kidney	20.51	15.75	4.76	0.036906
	Lung	23.19	18.99	4.2	0.19	0.876606			Caput epididymidis	21.6	17.59	4.01	0.0620683
	Kidney	20.51	15.75	4.76	0.75	0.594604			Cauda epididymidis	22.1	17.26	4.84	0.0349152
	Brain	20.66	15.79	4.87	0.86	0.550953			Testis	21.13	15.1	6.03	0.0153034
									Brain	20.66	15.79	4.87	0.0341967
	Caput epididymidis	21.3	17.56	3.74		1
	Cauda epididymidis	22.49	17.49	5	1.26	0.417544
	Heart	23.52	17.77	5.75	2.01	0.248273
	Testis	21.18	15.18	6	2.26	0.208772			Heart	23.52	17.77	5.75	0.0185814
	Liver	20.33	16.72	3.61	-0.13	1.09429			Liver	20.33	16.72	3.61	0.0818996
	Spleen	23.56	19.94	3.62	-0.12	1.08673			Spleen	23.56	19.94	3.62	0.0813339
	Lung	23.32	19.05	4.27	0.53	0.692555			Lung	23.32	19.05	4.27	0.0518325
	Kidney	20.29	15.81	4.48	0.74	0.598739			Kidney	20.29	15.81	4.48	0.0448111
	Brain	20.53	15.87	4.66	0.92	0.528509			Caput epididymidis	21.3	17.56	3.74	0.0748424
									Cauda epididymidis	22.49	17.49	5	0.03125
									Testis	21.18	15.18	6	0.015625
									Brain	20.53	15.87	4.66	0.0395549
		21.3	17.56	3.74	0.0748424
		22.49	17.49	5	0.03125
		23.52	17.77	5.75	0.0185814
		21.18	15.18	6	0.015625
		20.33	16.72	3.61	0.0818996
		23.56	19.94	3.62	0.0813339
		23.32	19.05	4.27	0.0518325
		20.29	15.81	4.48	0.0448111
		20.53	15.87	4.66	0.0395549

## Sheet: Sheet2
										stomach	colon	small bowel	muscle	womb	ovary
										0.0321286	0.0460709	0.060371	0.00109869	0.073812	0.0555527
										0.0432847	0.0363979	0.059954	0.00142977	0.0769465	0.0683934
										0.0435857	0.0432847	0.0486978	0.00139067	0.0842021	0.0660636
			stomach	24.42	19.46	4.96	0.0321286		AVE	0.0396663	0.0419178	0.0563409	0.00130638	0.0783202	0.0633366
			colon	22.96	18.52	4.44	0.0460709
			small bowel	22.21	18.16	4.05	0.060371
			muscle	26.68	16.85	9.83	0.00109869
			womb	22.96	19.2	3.76	0.073812
			ovary	21.17	17	4.17	0.0555527
			stomach	24.02	19.49	4.53	0.0432847
			colon	23.03	18.25	4.78	0.0363979
			small bowel	22.21	18.15	4.06	0.059954
			muscle	26.52	17.07	9.45	0.00142977
			womb	22.83	19.13	3.7	0.0769465
			ovary	21.3	17.43	3.87	0.0683934
			stomach	24.06	19.54	4.52	0.0435857
			colon	22.98	18.45	4.53	0.0432847
			small bowel	22.59	18.23	4.36	0.0486978
			muscle	26.63	17.14	9.49	0.00139067
			womb	22.77	19.2	3.57	0.0842021
			ovary	21.2	17.28	3.92	0.0660636
