# Supplementary material for: Cathepsin B plays a role in spermatogenesis and sperm maturation through regulating autophagy and apoptosis in mice
Source: PeerJ. 2022 Dec 2;10:e14472. doi: 10.7717/peerj.14472 (PMC9744162; doi:10.7717/peerj.14472)
Supplement: Supplemental Information 2 [file peerj-10-14472-s002.xlsx]

## Sheet: Sheet1
	wt1	4	8	6	7	8	11	9
	wt2	6	7	12	9	9
	wt3	6	13	10	10
	wt4	3	4	9	12	9	9
	CTSB1	4	7	6	7
	CTSB2	6	5	8	6
	CTSB3	8	7	4	12
	CTSB4	8	9	5	7	4	6
							0.0403806
