# Supplementary material for: Cathepsin B plays a role in spermatogenesis and sperm maturation through regulating autophagy and apoptosis in mice
Source: PeerJ. 2022 Dec 2;10:e14472. doi: 10.7717/peerj.14472 (PMC9744162; doi:10.7717/peerj.14472)
Supplement: Supplemental Information 4 [file peerj-10-14472-s004.xlsx]

## Sheet: Sheet1
				WT					KO
			weight	28.25	25.49	27.25			27.01	24.99	23.31
			testes	0.1022	0.0851	0.0827	0.09		0.0961	0.07	0.0736	0.0799
			epididymis	0.0427	0.0324	0.0391	0.0380667		0.0421	0.0367	0.0322	0.037
			seminal vesicle	0.3735	0.2939	0.3345	0.333967		0.3102	0.2547	0.3541	0.306333
							0.378831
							0.81024
							0.494612
