# Supplementary material for: Cathepsin B plays a role in spermatogenesis and sperm maturation through regulating autophagy and apoptosis in mice
Source: PeerJ. 2022 Dec 2;10:e14472. doi: 10.7717/peerj.14472 (PMC9744162; doi:10.7717/peerj.14472)
Supplement: Supplemental Information 5 [file peerj-10-14472-s005.xlsx]

## Sheet: Sheet1
CTSB
	KO	WT			WT	KO			WT	KO		ko	wt
	16	18			13	15			22	15		14	17
	21	17			18	19			16	19		21	24
	17	22			18	16			16	15		17	17
	14	24			19	17			19	17		16	21
	18	16			18	10			18	23		21	16
	12	17			20	16			17	21		19	15
	15	19			25	14			20	22		15	20
	19	17			21	14			14	15		12	16
	12	18			21	18			15	21		15	20
	14	14			19	15			17	14		16	20
	14	182			192	154			174	182
	17				19.2	15.4			17.4	18.2		166	186
	189											16.6	18.6
	15.75	18.2
		WT	KO
		15.75	18.2
		19.2	15.4
		17.4	18.2
		16.6	18.6
	AVE	17.2375	17.6
	P		0.740067
