# Supplementary material for: Cathepsin B plays a role in spermatogenesis and sperm maturation through regulating autophagy and apoptosis in mice
Source: PeerJ. 2022 Dec 2;10:e14472. doi: 10.7717/peerj.14472 (PMC9744162; doi:10.7717/peerj.14472)
Supplement: Supplemental Information 6 [file peerj-10-14472-s006.xlsx]

## Sheet: Sheet1
WT	Ctsb-/-
24.4582	35.0553
24.5614	54.1872
17.0543	53.3898
24.5399	37.2624
