# Supplementary material for: Cathepsin B plays a role in spermatogenesis and sperm maturation through regulating autophagy and apoptosis in mice
Source: PeerJ. 2022 Dec 2;10:e14472. doi: 10.7717/peerj.14472 (PMC9744162; doi:10.7717/peerj.14472)
Supplement: Supplemental Information 8 [file peerj-10-14472-s008.xlsx]

## Sheet: Sheet1
		WT								KO
Acrosome malformation rate		5	16	21	0.238095	23.8095				8	29	0.275862	27.5862
		15		70	0.214286	21.4286				6	19	0.315789	31.5789
		4	17	32	0.125	12.5				9	28	0.321429	32.1429
		5		23	0.217391	21.7391				10	27	0.37037	37.037
						19.8693
					P	0.008452							32.0863
